# Supplementary material
Source: Springer Nature journal article supplement (https://www.springermedizin.de/resource/supplementary/13013_2011_545_MOESM3_ESM.pdf/9631906)

**Affidabilità dei dati**

95%

|                                            |      |
|--------------------------------------------|------|
| Numero di campioni                         | 100% |
| Delta T massimi/minimi                     | 100% |
| Delta T indossato/non indossato            | 100% |
| Passaggi indossato/non indossato al giorno | 57%  |
| Dati validi                                | 100% |

Tempo di campionamento

60 minuti

**Tempo medio di indossamento calcolato 21.8 ore**

Ultima prescrizione 23-11-2009 23 ore => - 1.2 ore (94%)

**Media mensile ore**

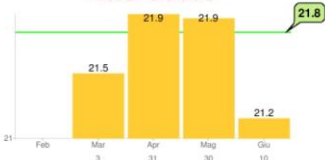

**Indossamento per ore giornata**

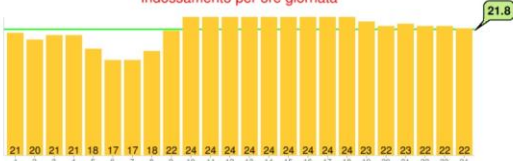

**Media ore giorno settimana**

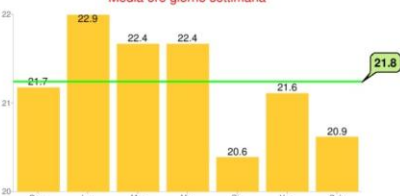

**Transizioni al giorno**

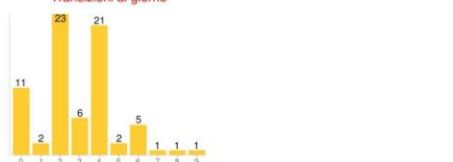

**Numero giorni per ore di indossamento**

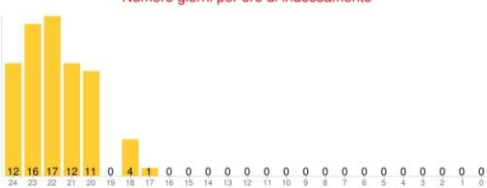

**Giornate con valori anomali**

- 2010-02-26 Indossamento iniziale (> 10 ore)
- 19-03-2010 18 ore
- 20-03-2010 18 ore
- 22-03-2010 17 ore
- 30-04-2010 18 ore
- 07-05-2010 18 ore
- 11-05-2010 Fine indossamento

**Grafico dati grezzi: da 26-02-2010 a 28-03-2010**

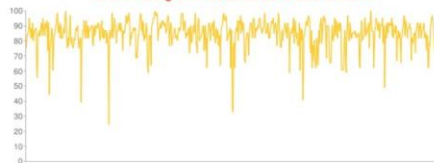

**Grafico dati grezzi: da 28-03-2010 a 27-04-2010**

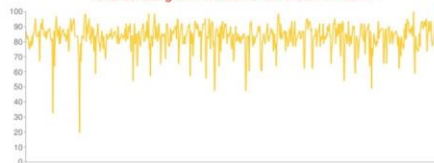

**Grafico dati grezzi: da 27-04-2010 a 27-05-2010**

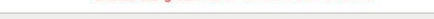

Supplement: MOESM3 [file 9631906]
